# Supplementary material
Source: publisher figshare collection journal article supplement (https://acs.figshare.com/ndownloader/files/31252800)
Supplement: Supplementary file 1 [file 31252800]

## **Supporting Information**

# **Electrochemiluminescence Immunosensor Based on Nanobody and Au/CaCO<sub>3</sub> Synthesized Using Waste Eggshells for Ultrasensitive Detection of Ochratoxin A**

**Linzhi Li<sup>#</sup>, Xing Liu<sup>#</sup>, Saijun He, Hongmei Cao, Benchao Su, Tianzeng Huang, Qi  
Chen, Minghuan Liu, Da-Peng Yang**

---

Corresponding author.

E-mail addresses: hmcao@hainanu.edu.cn (Hongmei Cao)

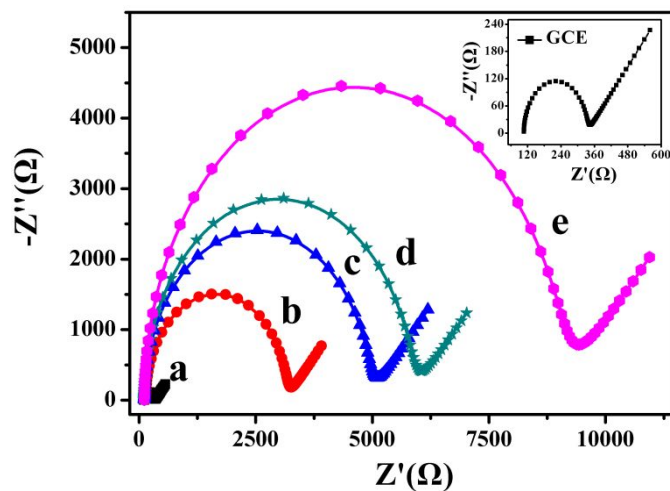

Figure S1. Nyquist plots of EIS of GCE(a), Au/CaCO<sub>3</sub>/Nafion/GCE(b), Ru(bpy)<sub>3</sub><sup>2+</sup>/Au/CaCO<sub>3</sub>/Nafion/GCE(c), Nb28/Ru(bpy)<sub>3</sub><sup>2+</sup>/Au/CaCO<sub>3</sub>/Nafion/GCE(d), OTA/BSA/Nb28/Ru(bpy)<sub>3</sub><sup>2+</sup>/Au/CaCO<sub>3</sub>/Nafion/GCE(e) in 10 mM [Fe(CN)<sub>6</sub>]<sup>3-/4-</sup> (1:1) containing 0.1 M KCl in the frequency range of 10<sup>-1</sup> to 10<sup>5</sup> Hz.

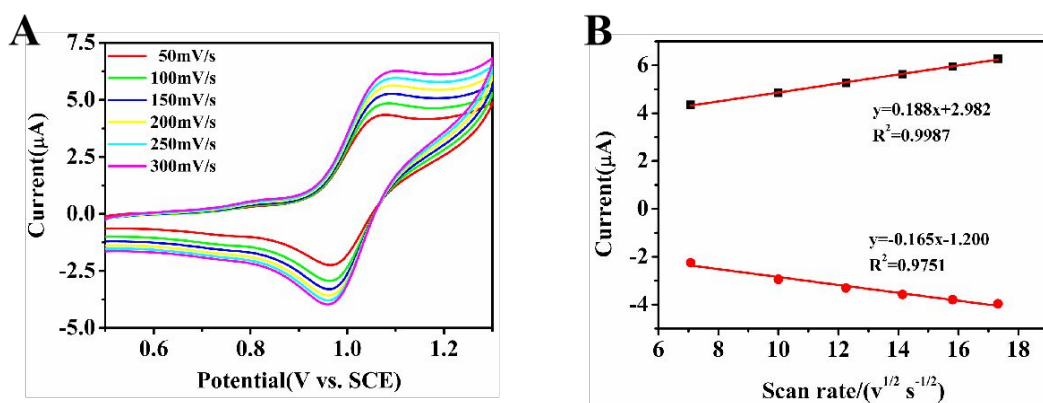

Figure S2. (A) CV curves of OTA/BSA/Nb28/Ru(bpy)<sub>3</sub><sup>2+</sup>/Au/CaCO<sub>3</sub>/Nafion/GCE at different scan rates (50-300 mV s<sup>-1</sup>) in 1×PBS solution; (B) A linear relationship between the square root of the scan rate and the current density.

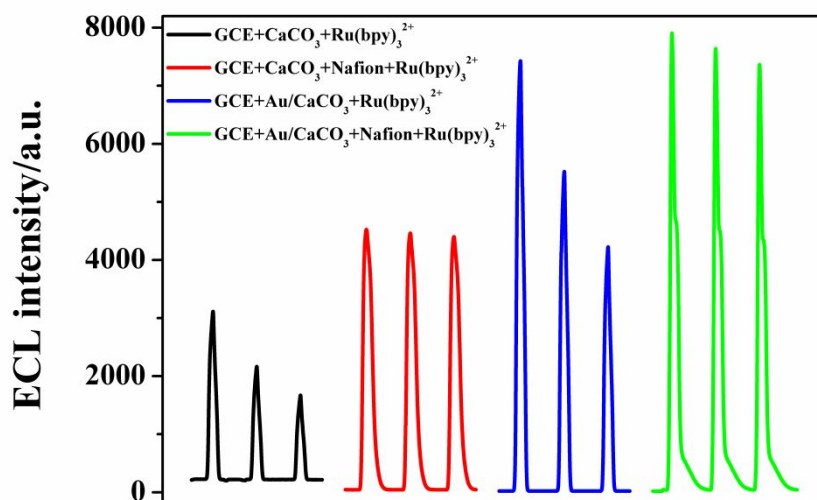

Figure S3. ECL responses of  $\text{Ru}(\text{bpy})_3^{2+}/\text{CaCO}_3/\text{GCE}$ ,  $\text{Ru}(\text{bpy})_3^{2+}/\text{Nafion}/\text{CaCO}_3/\text{GCE}$ ,  $\text{Ru}(\text{bpy})_3^{2+}/\text{Au}/\text{CaCO}_3/\text{GCE}$ ,  $\text{Ru}(\text{bpy})_3^{2+}/\text{Nafion}/\text{Au}/\text{CaCO}_3/\text{GCE}$  in  $1\times\text{PBS}$  containing  $0.05\text{ mM}$  TPA solution.

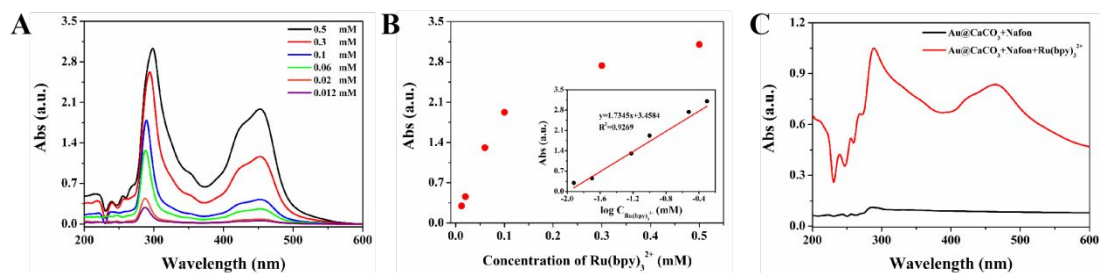

Figure S4. (A) UV-vis spectra of  $\text{Ru}(\text{bpy})_3^{2+}$  in different concentrations; (B) Calibration curve of the absorbance value and logarithm of  $\text{Ru}(\text{bpy})_3^{2+}$  concentration; (C) UV-vis spectra of  $\text{Au}/\text{CaCO}_3$  and  $\text{Ru}(\text{bpy})_3^{2+}/\text{Au}/\text{CaCO}_3$ .
